# Supplementary material for: Effective strategy for enhancing Z-scheme water splitting with the IO3−/I− redox mediator by using a visible light responsive TaON photocatalyst co-loaded with independently optimized two different cocatalysts
Source: Royal Society of Chemistry journal article supplement (doi:10.1039/c9se00136k), 2019-01-01
Supplement: c9se00136k1.pdf [file c9se00136k1.pdf]

## Electronic Supplementary Information

### Effective Strategy for Enhancing Z-scheme Water Splitting with $\text{IO}_3^-/\text{I}^-$ Redox Mediator by using Visible Light Responsive TaON Photocatalyst Co-loaded with Independently Optimized Two Different Cocatalysts

Yukari Iwase,<sup>a</sup> Osamu Tomita,<sup>a</sup> Masanobu Higashi,<sup>a</sup> Akinobu Nakada<sup>a</sup> and Ryu Abe<sup>\*a, b</sup>

<sup>a</sup>Graduate School of Engineering, Kyoto University, Katsura, Nishikyo-ku, Kyoto 615-8510, Japan

<sup>b</sup>JST-CREST, 7 Gobancho, Chiyoda-ku, Tokyo 102-0076, Japan

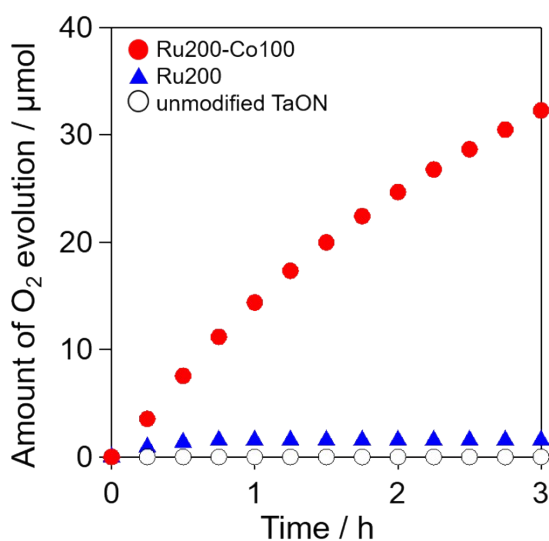

Figure S1. Time courses of photocatalytic oxidation of water on TaON photocatalyst loaded with metal cation species in aqueous solution containing  $\text{NaIO}_3$  (1 mM) under visible light irradiation (photocatalyst; 50 mg, amount of Milli-Q water; 180 mL, irradiation wavelength;  $\lambda > 400$  nm).

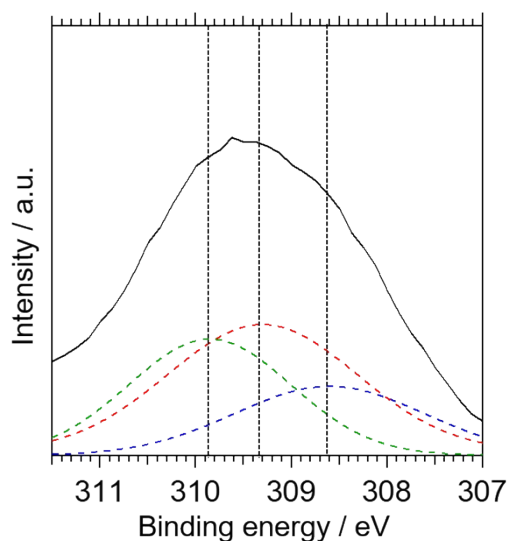

Figure S2. XPS spectrum of Rh3d<sub>5/2</sub> region for TaON loaded with Rh species prepared by the impregnation followed by calcination at 500 °C in air (1 wt% as Rh metal). The binding energy of the deposited Au was adjusted to 84.0 eV.

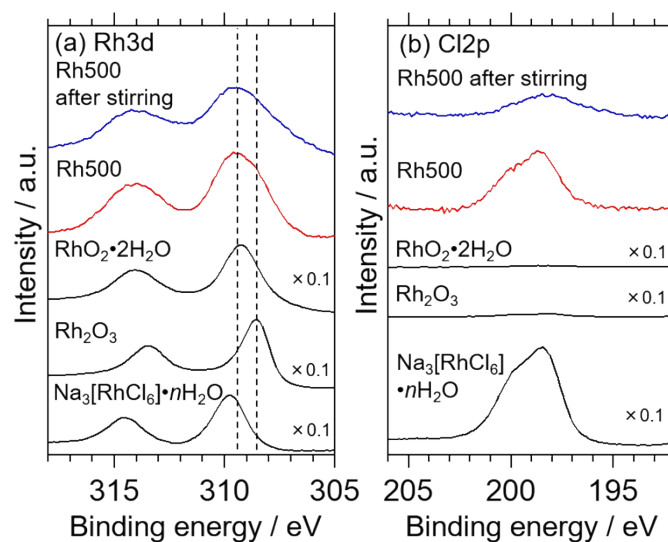

Figure S3. XPS spectra of Rh3d region for TaON loaded with Rh species prepared at 500 °C and sample after stirring in aqueous solution under dark for 3 h, along with those of RhO<sub>2</sub>·2H<sub>2</sub>O, Rh<sub>2</sub>O<sub>3</sub>, and Na<sub>3</sub>[RhCl<sub>6</sub>]·nH<sub>2</sub>O for comparison. The binding energy of the deposited Au was adjusted to 84.0 eV.

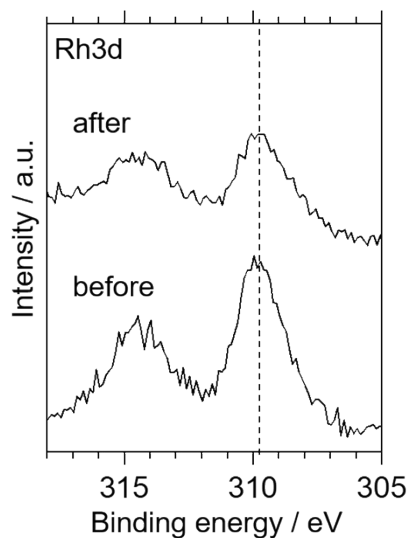

Figure S4. XPS spectra of Rh3d region for Rh500-Ru200 samples before and after reaction. The binding energy of the deposited Au was adjusted to 84.0 eV.

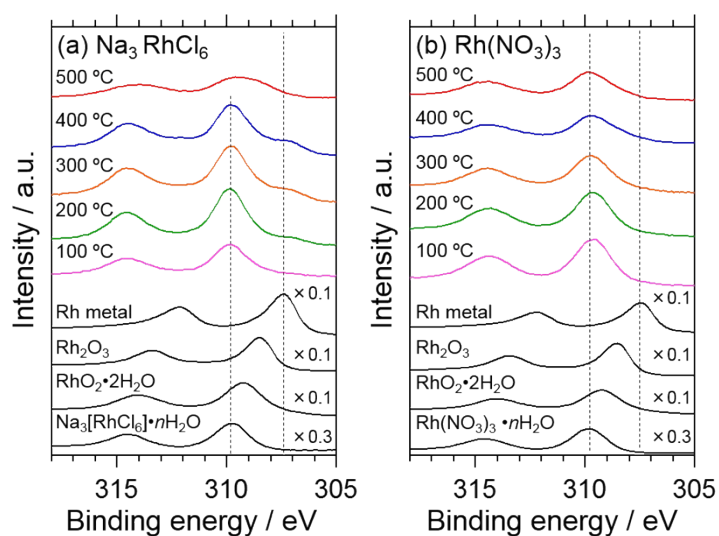

Figure S5. XPS spectra of Rh3d region for TaON samples loaded with Rh species using (a)  $\text{Na}_3[\text{RhCl}_6] \cdot n\text{H}_2\text{O}$ , (b)  $\text{Rh}(\text{NO}_3)_3 \cdot n\text{H}_2\text{O}$  as precursor and those of reference samples. The binding energy of the deposited Au was adjusted to 84.0 eV. The loading of Rh species from  $\text{Rh}(\text{NO}_3)_3 \cdot n\text{H}_2\text{O}$  was carried out in same manner as to that from  $\text{Na}_3[\text{RhCl}_6] \cdot n\text{H}_2\text{O}$  described in the main text.

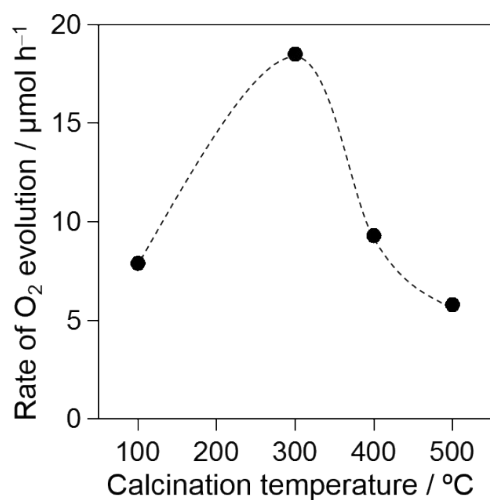

Figure S6. The rate of O<sub>2</sub> evolution on TaON photocatalyst co-loaded with Rh species with Rh(NO<sub>3</sub>)<sub>3</sub>•*n*H<sub>2</sub>O at different temperature (100–500 °C) and Ru species at 200 °C from aqueous solution containing NaIO<sub>3</sub> (1 mM) under visible light irradiation (photocatalyst; 50 mg, amount of Milli-Q water; 180 mL, irradiation wavelength;  $\lambda > 400$  nm).

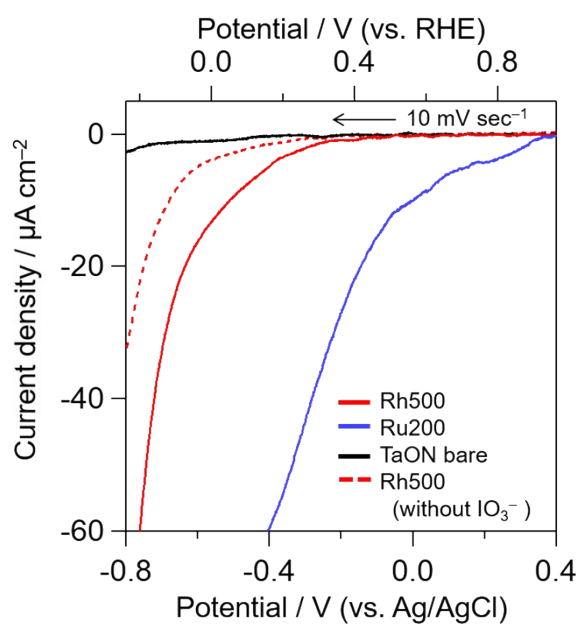

Figure S7. Current-potential curves of TaON electrodes loaded with Rh species, along with those of TaON electrode loaded with Ru species and unmodified TaON electrode in Na<sub>2</sub>SO<sub>4</sub> (0.1 M) solution containing NaIO<sub>3</sub> (1 mM) under dark.

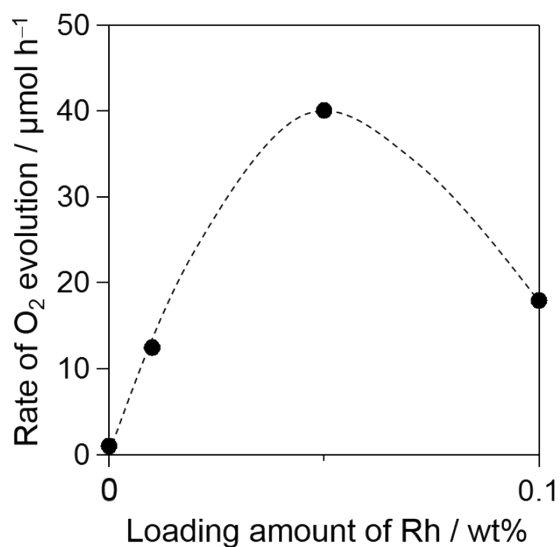

Figure S8. Influence of the loading amount of Rh species on the rate of O<sub>2</sub> evolution on TaON co-loaded with  $x$  wt% Rh at 500 °C and 0.1wt% Ru at 200 °C photocatalysts (50 mg) suspended in an aqueous solution containing NaIO<sub>3</sub> (1 mM) with NaI (0.2 mM) under visible light irradiation (amount of water; 180 mL, irradiation wavelength;  $\lambda > 400$  nm).

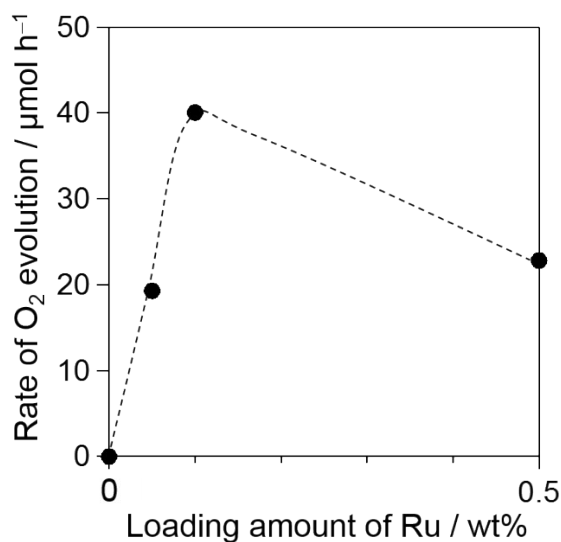

Figure S9. Influence of the loading amount of Ru species on the rate of O<sub>2</sub> evolution on TaON co-loaded with 0.05 wt% Rh at 500 °C and  $x$  wt% Ru at 200 °C (50 mg) suspended in an aqueous solution containing NaIO<sub>3</sub> (1 mM) with NaI (0.2 mM) under visible light irradiation (amount of water; 180 mL, irradiation wavelength;  $\lambda > 400$  nm).
